# Supplementary material
Source: PubMed Central journal article supplement (PMC7867608)
Supplement: NIHMS1634645-supplement-Supplementary_Material.pdf [file NIHMS1634645-supplement-Supplementary_Material.pdf]

## SUPPLEMENTARY LEGENDS

### Supplementary Tables:

#### Table S1. *ENPP1* variants for prevalence calculation.

The first sheet presents known pathogenic variants (allele count 93). The second sheet contains predicted pathogenic variants (allele count 179). Total allele frequency is 0.224%, or 1 in 446. Using the Hardy-Weinberg principle, the carrier frequency was calculated to be 1 in 224 and the incidence of biallelic *ENPP1* deficiency was calculated to be 1 in 199,238 live births. The third sheet contains predicted non-pathogenic *ENPP1* variants, not factored into the aforementioned calculations.

### Supplementary Figures:

#### Figure S1. Family pedigrees.

Pedigrees of the 17 families described in this paper.

Family 1

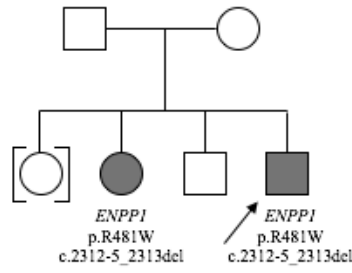

Family 2

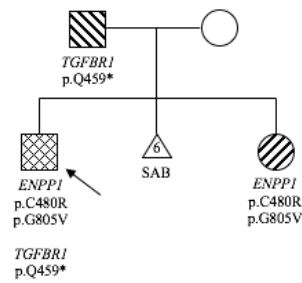

Family 3

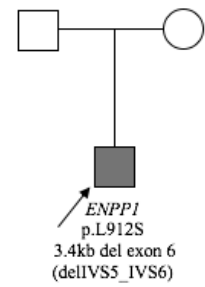

Family 4

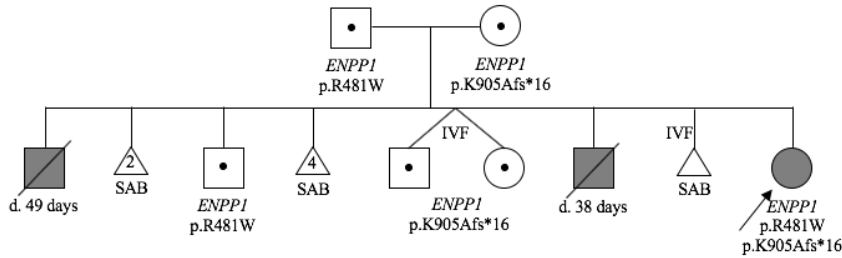

Family 5

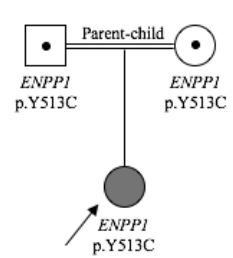

Family 6

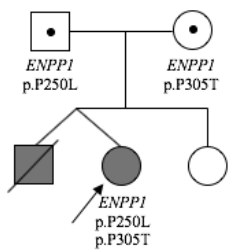

Family 7

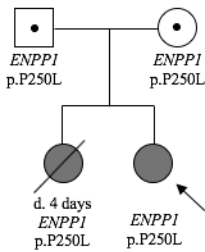

Family 8

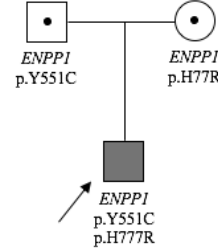

Family 9

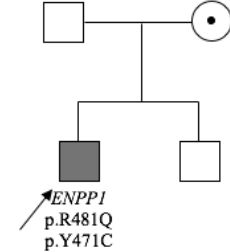

Family 10

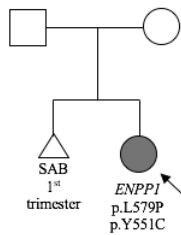

Family 11

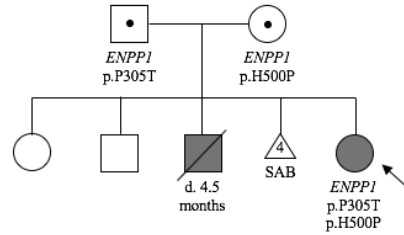

Family 12

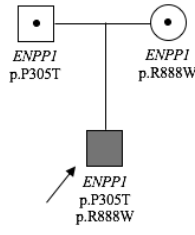

Family 13

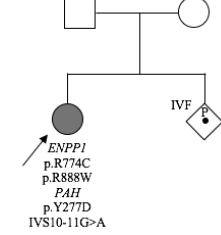

Family 14

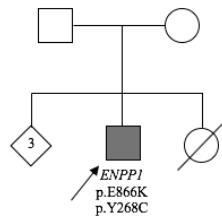

Family 15

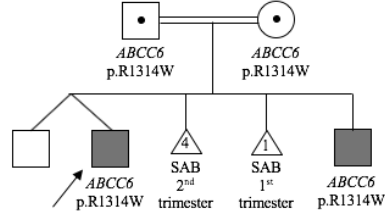

Family 16

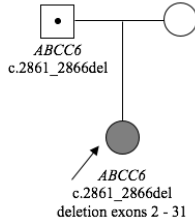

Family 17

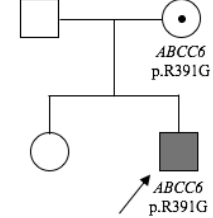

**Figure S2. Position of variants found in our cohort.**

*ENPP1* (NM\_006208.2)

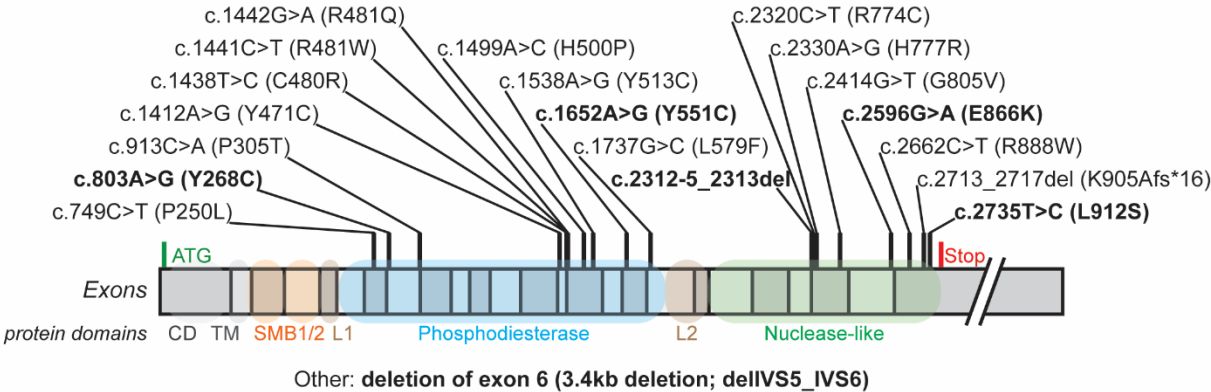

*ABCC6* (NM\_001171.5)

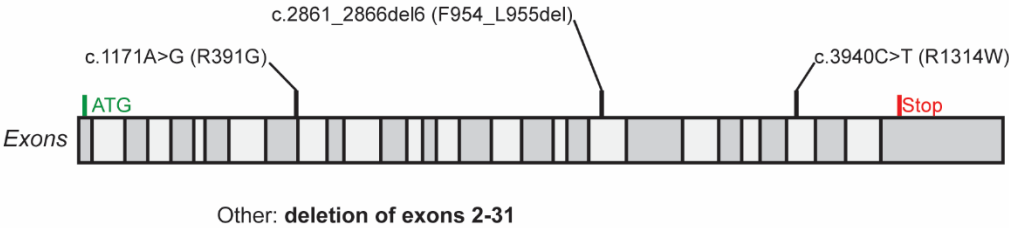

**Figure S3. Arterial stenosis.** Three-dimensional CT video reconstruction showing bilateral external iliac artery occlusion with prominent collaterals (Patient 10 at 5 years old).
